# Supplementary material for: Formal arylation of NH3 to produce diphenylamines over supported Pd catalysts
Source: Royal Society of Chemistry journal article supplement (doi:10.1039/c7cc06737b), 2017-01-01
Supplement: c7cc06737b1.pdf [file c7cc06737b1.pdf]

*Electronic Supplementary Information (ESI) for*

## **Formal arylation of NH<sub>3</sub> to produce diphenylamines over supported Pd catalysts**

Yu Koizumi,<sup>a</sup> Kento Taniguchi,<sup>a</sup> Xiongjie Jin,<sup>\*b</sup> Kazuya Yamaguchi,<sup>\*a</sup> Kyoko Nozaki<sup>b</sup>  
and Noritaka Mizuno<sup>\*a</sup>

<sup>a</sup>Department of Applied Chemistry, School of Engineering, The University of Tokyo  
7-3-1 Hongo, Bunkyo-ku, Tokyo 113-8656, Japan

<sup>b</sup>Department of Chemistry and Biotechnology, School of Engineering, The University of Tokyo  
7-3-1 Hongo, Bunkyo-ku, Tokyo 113-8656, Japan

### **Experimental Section**

#### **Instruments and reagents**

Gas Chromatography (GC) analyses were performed on Shimadzu GC-2014 equipped with a flame ionization detector (FID) using a capillary column (InertCap5 or TC-Wax) for liquid phase analyses. GC mass spectrometry (GC-MS) spectra were recorded on Shimadzu GCMSQP2010 equipped with a capillary column (InertCap5) at an ionization voltage of 70 eV. Liquid-state <sup>1</sup>H and <sup>13</sup>C NMR spectra were recorded on JEOL JNM-ECA-500 at 495.1 MHz and 124.5 MHz, respectively, with TMS as an internal standard ( $\delta = 0$  ppm). ICP-AES analyses were performed on Shimadzu ICP-8100. TEM observations were performed on JEOL JEM-2000EX. TEM samples were prepared by placing a drop of the suspension on carbon-coated Cu grids. XPS measurements were carried out on JEOL JPS-9000 using Mg K $\alpha$  radiation ( $h\nu = 1253.6$  eV, 8 kV, 10 mA). The binding energies were calibrated by using the Au 4f<sub>7/2</sub> signal at 84.0 eV. BET surface areas were measured by N<sub>2</sub> adsorption at -196 °C using a Micromeritics ASAP 2010 instrument. Al<sub>2</sub>O<sub>3</sub> (BET surface area: 160 m<sup>2</sup> g<sup>-1</sup>, Cat. No. KHS-24, Sumitomo Chemical), TiO<sub>2</sub> (BET surface area: 316 m<sup>2</sup> g<sup>-1</sup>, Cat. No. ST-01, Ishihara Sangyo Kaisya), ZrO<sub>2</sub> (BET surface area: 9 m<sup>2</sup> g<sup>-1</sup>, Cat. No. 37022, Nacalai Tesque), CeO<sub>2</sub> (BET surface area: 111 m<sup>2</sup> g<sup>-1</sup>) LDH (Mg<sub>6</sub>Al<sub>2</sub>(OH)<sub>16</sub>CO<sub>3</sub>·4H<sub>2</sub>O, BET surface area: 51 m<sup>2</sup> g<sup>-1</sup>, Tomita Pharmaceutical Co., Ltd.), Pd/C (Lot. No. 217-024030, NE CHEMCAT), Pt/Al<sub>2</sub>O<sub>3</sub> (Lot. No. 137-90020, NE CHEMCAT), and Ru/Al<sub>2</sub>O<sub>3</sub> (Lot. No. SH-KO 362-02, NE CHEMCAT) were commercially available. Solvents and substrates were obtained from Kanto Chemical, TCI, Wako, FLUKA, or Aldrich (reagent grade), and purified prior to the use, if necessary (See: *Purification of Laboratory Chemicals*, 3rd ed. (Eds.: D. D. Perrin, W. L. F. Armarego), Pergamon Press, Oxford, 1988.).

### Preparation of catalysts

Pd/Al<sub>2</sub>O<sub>3</sub> was prepared as follows. Al<sub>2</sub>O<sub>3</sub> (2.0 g) was added to a 60 mL aqueous solution of PdCl<sub>2</sub> (8.3 mM) and KCl (two equivalents with respect to PdCl<sub>2</sub>, 16.7 mM). The mixture was vigorously stirred at room temperature for 15 min. Then, the pH of the mixture was adjusted to 10.0 by using an aqueous solution of NaOH (1.0 M, *ca.* 1.5 mL), and the resulting slurry was further stirred for 24 h at room temperature. The solid was then filtered off, washed with water (3 L), and dried in vacuo overnight to afford the hydroxide precursor Pd(OH)<sub>x</sub>/Al<sub>2</sub>O<sub>3</sub>. By the reduction of Pd(OH)<sub>x</sub>/Al<sub>2</sub>O<sub>3</sub> using H<sub>2</sub> (1 atm) at 150 °C for 30 min, Pd/Al<sub>2</sub>O<sub>3</sub> was obtained. The XPS spectrum of Pd/Al<sub>2</sub>O<sub>3</sub> showed the binding energies of Pd 3d<sub>3/2</sub> and 3d<sub>5/2</sub> at 340.4 eV and 335.0 eV, respectively (Fig. S6). This indicated the Pd<sup>2+</sup> species in the hydroxide precursor were reduced to Pd<sup>0</sup> by the H<sub>2</sub> treatment. The similar procedure was applied to the preparation of the other supported Pd catalysts. The loading amounts (determined by ICP-AES analyses) and the average particles sizes of Pd (determined by TEM analyses) are summarized in Table S5. Au/Al<sub>2</sub>O<sub>3</sub>, Cu/Al<sub>2</sub>O<sub>3</sub>, Rh/Al<sub>2</sub>O<sub>3</sub>, and Pd–Fe/Al<sub>2</sub>O<sub>3</sub> were also prepared by the similar procedure.

### Catalytic reactions

A typical procedure for the reaction: Into a Schlenk tube (volume: *ca.* 20 mL) were successively placed Pd/Al<sub>2</sub>O<sub>3</sub> (Pd: 1.6 mol% with respect to the cyclohexanone), urea (0.5 mmol), H<sub>2</sub>O (10 μL), cyclohexanone (**1a**, 1.0 mmol), diglyme (2 mL), and a Teflon-coated magnetic stir bar (without a stir bar when the reuse experiment was carried out). Then, a balloon partially filled with Ar was connected to the reactor. The reaction was carried out at 150 °C for 24 h with stirring. When the reuse experiment was carried out, the reaction mixture was stirred by the laboratory shaker. After the reaction was completed, an internal standard (biphenyl) was added to the reaction mixture, and the conversion of cyclohexanone and the product yields were determined by GC analysis. As for the isolation of the products, an internal standard was not added. After the reaction, the catalyst was filtered off (>85% recovery). The filtrate was evacuated to remove diglyme while heating at 60 °C. The crude products were subjected to column chromatography on silica gel (see Product data for the eluent utilized), giving the pure diarylamine products. The products were identified by the GC-MS and/or NMR (<sup>1</sup>H and <sup>13</sup>C) analyses. The retrieved catalyst was washed with acetone then with water, and heated at 150 °C for 30 min under H<sub>2</sub> (1 atm) prior to being used for the reuse experiment. The detection of hydrogen in the gas-phase was carried out with MS analysis. The quantification of hydrogen gas formation was performed by measurement of the evolved gas volume.

### **Product data**

**Diphenylamine (2a), (CAS No. 122-39-4):** A mixture of toluene and *n*-hexane (toluene : *n*-hexane = 75 : 25) was utilized as the eluent for column chromatography. <sup>1</sup>H NMR (500 MHz, CDCl<sub>3</sub>, 25 °C, TMS): δ = 7.28–7.24 (m, 4H), 7.08–7.05 (m, 4H), 6.94–6.91 (m, 2H), 5.69 (brs, 1H); <sup>13</sup>C NMR (125 MHz, CDCl<sub>3</sub>, 25 °C, TMS): δ = 143.1, 129.3, 121.0, 117.8; MS (70 eV, EI): *m/z* (%): 170 (18), 169 (100) [*M*<sup>+</sup>], 168 (80), 167 (42), 166 (7), 141 (7), 139 (5), 115 (6), 84 (6), 83 (28), 77 (14), 66 (10), 65 (8), 59 (6), 51 (14), 39 (6).

***o,o'*-Ditolylamine (2b), (CAS No. 617-00-5):** MS (70 eV, EI): *m/z* (%): 198 (15), 197 (100) [*M*<sup>+</sup>], 196 (19), 194 (5), 182 (31), 181 (17), 180 (29), 179 (5), 167 (12), 106 (18), 105 (6), 104 (28), 98 (9), 97 (17), 93 (8), 91 (7), 90 (10), 84 (6), 77 (7), 65 (6).

***m,m'*-Ditolylamine (2c), (CAS No. 626-13-1):** MS (70 eV, EI): *m/z* (%): 198 (16), 197 (100) [*M*<sup>+</sup>], 196 (18), 182 (10), 181 (21), 180 (11), 167 (9), 97 (8), 91 (6), 77 (6), 65 (6).

***p,p'*-Ditolylamine (2d), (CAS No. 620-93-9):** MS (70 eV, EI): *m/z* (%): 198 (17), 197 (100) [*M*<sup>+</sup>], 196 (54), 182 (5), 181 (11), 180 (13), 98 (8), 96 (15), 91 (17), 90 (5).

**4,4'-bis-(*tert*-Butylphenyl)amine (2e), (CAS No. 4627-22-9):** MS (70 eV, EI): *m/z* (%): 282 (7), 281 (33) [*M*<sup>+</sup>], 267 (22), 266 (100), 250 (9), 236 (6), 126 (10), 112 (6), 98 (24), 57 (6).

**2,2',5,5'-bis-(Dimethylphenyl)amine (2g), (CAS No. 117043-82-0):** MS (70 eV, EI): *m/z* (%): 226 (19), 225 (100) [*M*<sup>+</sup>], 224 (10), 210 (28), 209 (9), 195 (19), 194 (16), 193 (6), 120 (15), 119 (7), 118 (33), 112 (7), 111 (6), 107 (7), 104 (9), 91 (7), 77 (7).

**2,2'-bis-(Methoxyphenyl)amine (2h), (CAS No. 7287-75-4):** A mixture of toluene and *n*-hexane (toluene : *n*-hexane = 75 : 25) was utilized as the eluent for column chromatography. <sup>1</sup>H NMR (500 MHz, CDCl<sub>3</sub>, 25 °C, TMS): δ = 7.38–7.35 (m, 2H), 6.89–6.86 (m, 6H), 7.38–7.35; <sup>13</sup>C NMR (125 MHz, CDCl<sub>3</sub>, 25 °C, TMS): δ = 149.0, 132.4, 120.7, 120.1, 115.4, 110.5, 55.6; MS (70 eV, EI): *m/z* (%): 230 (16), 229 (100) [*M*<sup>+</sup>], 214 (10), 184 (13), 183 (88), 182 (35), 170 (10), 154 (8), 115 (8), 107 (5).

**4,4'-bis-(Ethoxyphenyl)amine (2i), (CAS No. 3949-80-2):** MS (70 eV, EI): *m/z* (%): 258 (13), 257 (78) [*M*<sup>+</sup>], 229 (18), 228 (100), 201 (7), 200 (36), 154 (6), 143 (6), 142 (5), 127 (7), 117 (6), 115 (6), 65 (6).

**4,4'-bis-(Ethoxycarbonylphenyl)amine (2j), (CAS No. 53884-32-5):** A mixture of toluene and EtOAc (toluene : EtOAc = 90 : 10) was utilized as the eluent for column chromatography. <sup>1</sup>H NMR

(500 MHz, CDCl<sub>3</sub>, 25 °C, TMS):  $\delta$  = 7.99–7.96 (m, 4H), 7.15–7.12 (m, 4H), 6.68 (brs, 1H), 4.35 (q,  $J$  = 7.2 Hz, 4H), 1.38 (t,  $J$  = 7.0 Hz, 6H); <sup>13</sup>C NMR (125 MHz, CDCl<sub>3</sub>, 25 °C, TMS):  $\delta$  = 166.4, 145.9, 131.4, 123.2, 116.8, 60.7, 14.4; MS (70 eV, EI):  $m/z$  (%): 314 (18), 313 (100) [ $M^+$ ], 285 (21), 268 (60), 257 (13), 240 (44), 167 (49), 166 (15), 112 (15), 84 (14), 84 (14), 65 (13).

**3,3'-bis-(Trifluoromethylphenyl)amine (2i)**, (CAS No. 7639-70-5): MS (70 eV, EI):  $m/z$  (%): 305 (100) [ $M^+$ ], 306 (16), 235 (13), 284 (13), 216 (8), 286 (7), 304 (7), 167 (7), 236 (5).

**4,4'-bis-(tert-Butyldimethylsilyloxyphenyl)amine (2j)**, (CAS No. 1448526-06-4): A mixture of *n*-hexane and chloroform (*n*-hexane : chloroform = 70 : 30) was utilized as the eluent for column chromatography. <sup>1</sup>H NMR (500 MHz, CDCl<sub>3</sub>, 25 °C, TMS):  $\delta$  = 6.87–6.84 (m, 4H), 6.75–6.71 (m, 4H), 5.26 (brs, 1H), 0.98 (s, 18H), 0.18 (s, 12H); <sup>13</sup>C NMR (125 MHz, CDCl<sub>3</sub>, 25 °C, TMS):  $\delta$  = 149.7, 138.2, 120.6, 119.2, 25.7, 18.2, -4.5; MS (70 eV, EI):  $m/z$  (%): 429 (100) [ $M^+$ ], 73 (61), 430 (37), 180 (27), 158 (23), 222 (20), 431 (14), 373 (6), 150 (6), 166 (5), 164 (5), 74 (5).

**Table S1** Effect of solvents on the formal arylation using urea and cyclohexanone (**1a**)<sup>a</sup>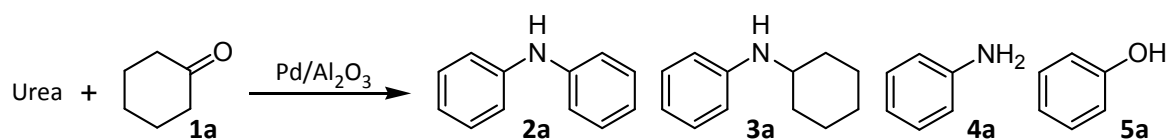

| Entry | Solvent          | Yield (%) |           |           |           |
|-------|------------------|-----------|-----------|-----------|-----------|
|       |                  | <b>2a</b> | <b>3a</b> | <b>4a</b> | <b>5a</b> |
| 1     | Diglyme          | 87        | 3         | 2         | 5         |
| 2     | Mesitylene       | 72        | 19        | 1         | 2         |
| 3     | DMA              | 54        | 23        | 3         | 9         |
| 4     | NMP              | 49        | 21        | 8         | 1         |
| 5     | <i>n</i> -Decane | 54        | 33        | 2         | 1         |

<sup>a</sup> Reaction conditions: Pd/Al<sub>2</sub>O<sub>3</sub> (Pd: 1.6 mol%), urea (0.5 mmol), water (10 μL), **1a** (1 mmol), solvent (2 mL), Ar (1 atm), 150 °C, 24 h. Yields (based on **1a**) were determined by GC using biphenyl as the internal standard.

**Table S2** Effect of temperatures on the formal arylation using urea and cyclohexanone (**1a**)<sup>a</sup>

| Entry | Temp. (°C) | Yield (%) |           |           |           |
|-------|------------|-----------|-----------|-----------|-----------|
|       |            | <b>2a</b> | <b>3a</b> | <b>4a</b> | <b>5a</b> |
| 1     | 140        | 10        | 86        | 4         | <1        |
| 2     | 150        | 87        | 3         | 2         | 5         |
| 3     | 160        | 71        | 2         | 11        | 6         |

<sup>a</sup> Reaction conditions: Pd/Al<sub>2</sub>O<sub>3</sub> (Pd: 1.6 mol%), urea (0.5 mmol), water (10 μL), **1a** (1 mmol), diglyme (2 mL), Ar (1 atm), 140–160 °C, 24 h. Yields (based on **1a**) were determined by GC using biphenyl as the internal standard.

**Table S3** Effect of amounts of urea on the formal arylation using urea and cyclohexanone (**1a**)<sup>a</sup>

| Entry | Amounts of urea (mmol) | Yield (%) |           |           |           |
|-------|------------------------|-----------|-----------|-----------|-----------|
|       |                        | <b>2a</b> | <b>3a</b> | <b>4a</b> | <b>5a</b> |
| 1     | 0.25                   | 73        | 2         | <1        | 18        |
| 2     | 0.5                    | 87        | 3         | 2         | 5         |
| 3     | 1.25                   | 40        | 9         | 30        | 1         |

<sup>a</sup> Reaction conditions: Pd/Al<sub>2</sub>O<sub>3</sub> (Pd: 1.6 mol%), urea (0.25–1.25 mmol), water (10 μL), **1a** (1 mmol), diglyme (2 mL), Ar (1 atm), 150 °C, 24 h. Yields (based on **1a**) were determined by GC using biphenyl as the internal standard.

**Table S4** Optimization of reaction conditions for the formal arylation using phenol (**5a**)<sup>a</sup>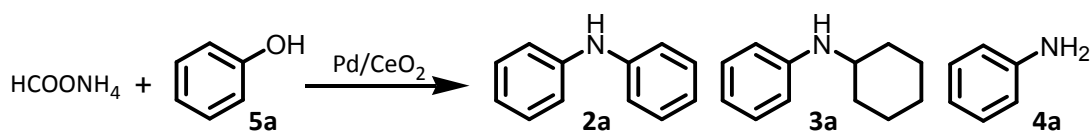

| Entry    | Catalyst (mol%)                        | Solvent           | Temp. (°C) | Yield (%) |              |                      |
|----------|----------------------------------------|-------------------|------------|-----------|--------------|----------------------|
|          |                                        |                   |            | <b>2a</b> | <b>3a</b>    | <b>4<sup>a</sup></b> |
| 1        | Pd/CeO <sub>2</sub> (2)                | Mesitylene        | 140        | 7         | 10           | 8                    |
| 2        | Pd/CeO <sub>2</sub> (5)                | Mesitylene        | 140        | 48        | 5            | 7                    |
| <b>3</b> | <b>Pd/CeO<sub>2</sub> (10)</b>         | <b>Mesitylene</b> | <b>140</b> | <b>73</b> | <b>&lt;1</b> | <b>5</b>             |
| 4        | Pd/CeO <sub>2</sub> (20)               | Mesitylene        | 140        | 52        | <1           | 5                    |
| 5        | Pd/Al <sub>2</sub> O <sub>3</sub> (10) | Mesitylene        | 140        | 48        | <1           | 3                    |
| 6        | Pd/C (10)                              | Mesitylene        | 140        | 42        | <1           | 5                    |
| 7        | Pd/TiO <sub>2</sub> (10)               | Mesitylene        | 140        | 40        | <1           | 5                    |
| 8        | Pd/MgO (10)                            | Mesitylene        | 140        | 38        | <1           | 5                    |
| 9        | Pd/ZrO <sub>2</sub> (10)               | Mesitylene        | 140        | 21        | 7            | 4                    |
| 10       | Pd/CeO <sub>2</sub> (10)               | <i>n</i> -Decane  | 140        | 60        | 16           | 3                    |
| 11       | Pd/CeO <sub>2</sub> (10)               | Diglyme           | 140        | <1        | <1           | 3                    |
| 12       | Pd/CeO <sub>2</sub> (10)               | DMA               | 140        | <1        | <1           | 2                    |
| 13       | Pd/CeO <sub>2</sub> (10)               | DMF               | 140        | <1        | <1           | <1                   |
| 14       | Pd/CeO <sub>2</sub> (10)               | Mesitylene        | 150        | 31        | <1           | 2                    |
| 15       | Pd/CeO <sub>2</sub> (10)               | Mesitylene        | 160        | 4         | <1           | <1                   |

<sup>a</sup> Reaction conditions: Catalyst (Pd: 2–10 mol%), HCOONH<sub>4</sub> (0.6 mmol), **5a** (0.4 mmol), solvent (2 mL), Ar (1 atm), 140–160 °C, 18 h. Yields (based on **5a**) were determined by GC using biphenyl as the internal standard.

**Table S5.** Pd contents and average particle sizes of various supported Pd nanoparticle catalysts.

| Catalyst                             | Pd content [mmol g <sup>-1</sup> ] | Average size [nm] |
|--------------------------------------|------------------------------------|-------------------|
| Pd/Al <sub>2</sub> O <sub>3</sub>    | 0.236                              | 2.7 ± 0.8         |
| Pd/TiO <sub>2</sub>                  | 0.228                              | 2.3 ± 0.7         |
| Pd/ZrO <sub>2</sub>                  | 0.227                              | 6.4 ± 3.1         |
| Pd/CeO <sub>2</sub>                  | 0.212                              | 2.1 ± 0.9         |
| Pd/LDH                               | 0.237                              | 2.9 ± 0.7         |
| Pd/C                                 | 0.223                              | 2.7 ± 0.6         |
| Pd–Fe/Al <sub>2</sub> O <sub>3</sub> | 0.215 (Fe: 0.202)                  | not measured      |

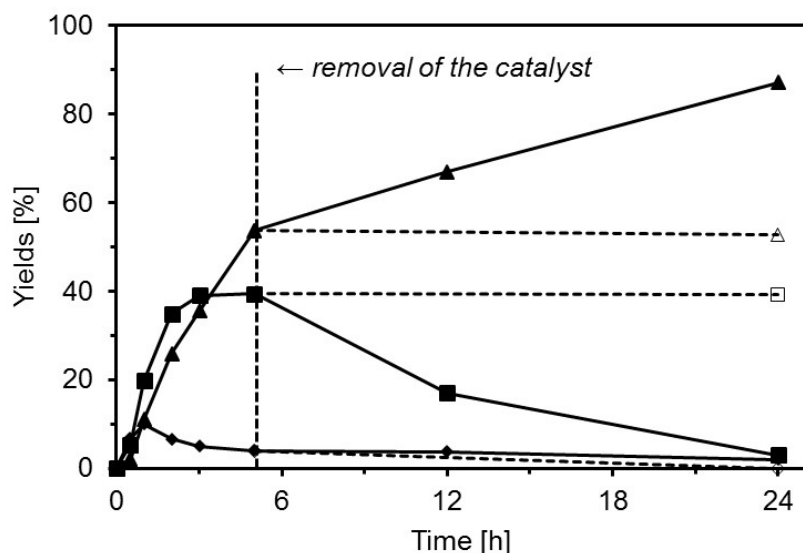

**Fig. S1** Effect of removal of the Pd/Al<sub>2</sub>O<sub>3</sub> catalyst on the dehydrogenation. The reaction conditions were the same as those described in Table 1. GC yields were determined using *n*-hexadecane as the internal standard. The closed triangles, squares, and diamonds indicate the yields of **2a**, **3a**, and **4a**, respectively, without removal of the catalyst. The open triangles, squares, and diamonds indicate the yields of **2a**, **3a**, and **4a**, respectively, after removal of the catalyst.

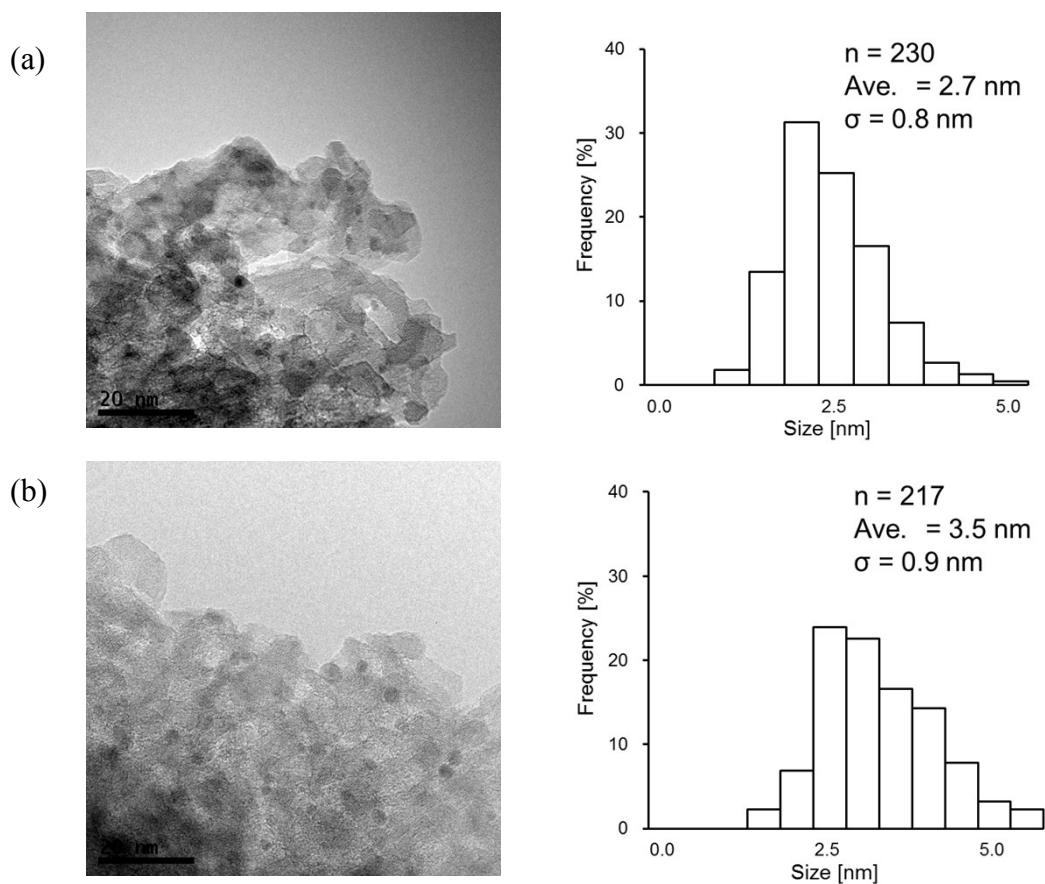

**Fig. S2** TEM images and Pd nanoparticle size distributions; (a) the freshly prepared Pd/Al<sub>2</sub>O<sub>3</sub> catalyst and (b) the Pd/Al<sub>2</sub>O<sub>3</sub> catalyst after the fifth reuse.

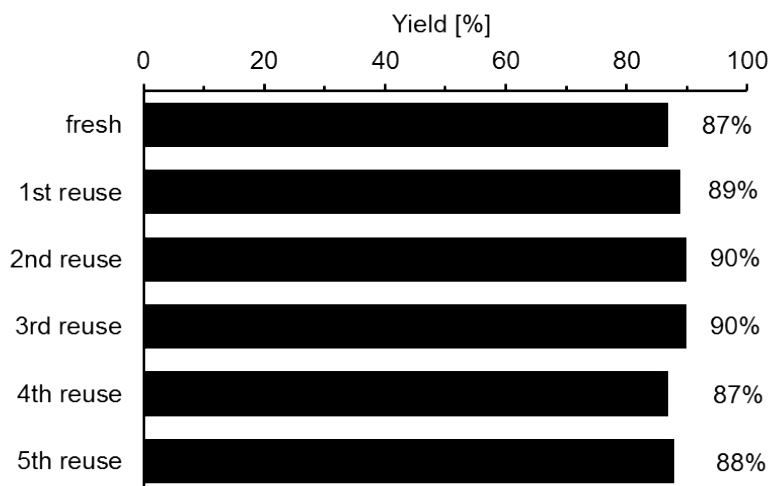

**Fig. S3** Pd/Al<sub>2</sub>O<sub>3</sub> reuse experiment. The reaction conditions were the same as those described in Table 1. The values indicate the yields of **2a**.

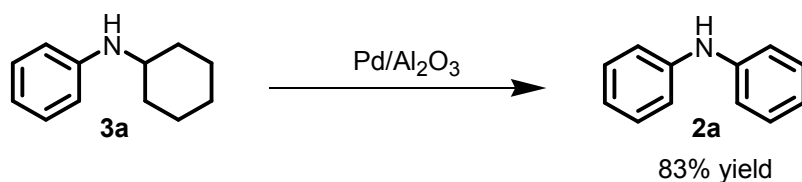

**Fig. S4** The reaction of **3a**. Reaction conditions: Pd/Al<sub>2</sub>O<sub>3</sub> (3.2 mol% to **3a**), **3a** (0.5 mmol), diglyme (2 mL), Ar (1 atm), 150 °C, 24 h. A Yield was determined by GC using biphenyl as the internal standard.

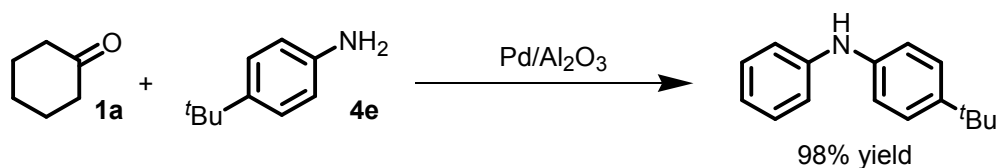

**Fig. S5** The reaction of **1a** and **4e**. Reaction conditions: Pd/Al<sub>2</sub>O<sub>3</sub> (3.2 mol% to **1a**), **1a** (0.5 mmol), **4e** (0.5 mmol), diglyme (2 mL), Ar (1 atm), 150 °C, 24 h. Yields (based on **1a**) were determined by GC using biphenyl as the internal standard.



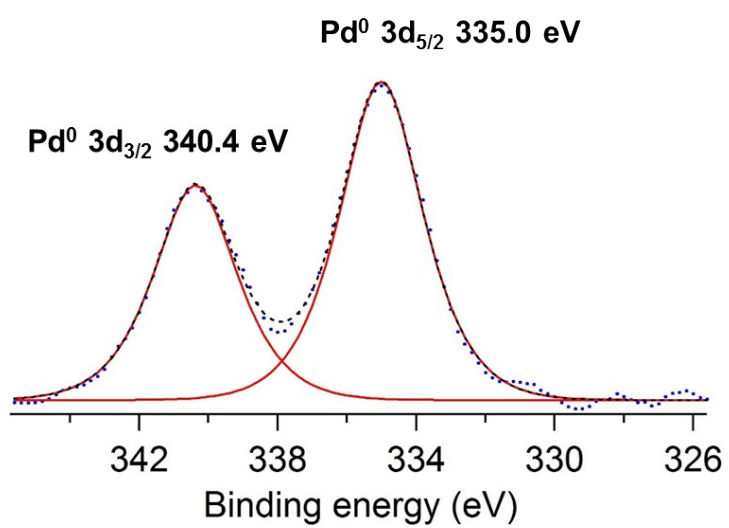

**Fig. S6** XPS spectra of the Pd/Al<sub>2</sub>O<sub>3</sub> catalyst around 3d components. The blue dots indicates the data points. The red solid and black broken lines indicate the deconvoluted signals, respectively.
